# Supplementary material
Source: PubMed Central journal article supplement (PMC9925653)
Supplement: 40121_2022_742_MOESM1_ESM.pdf [file 40121_2022_742_MOESM1_ESM.pdf]

## Supplementary Material

### Safety profiles of mRNA COVID-19 vaccines using World Health Organization global scale database (VigiBase) : A latent class analysis

Min-Taek Lee<sup>1,2</sup>, Wonbin Choi<sup>1,2</sup>, Seung-Hun You<sup>1,2</sup>, Sewon Park<sup>1,2</sup>, Jeong-Yeon Kim<sup>1,2</sup>,  
Dal Ri Nam<sup>1,2</sup>, Ju Won Lee<sup>1,2</sup>, Sun-Young Jung<sup>1,2\*</sup>

<sup>1</sup> College of Pharmacy, Chung-Ang University, Seoul, Republic of Korea

<sup>2</sup> Department of Global Innovative Drugs, The Graduate School of Chung-Ang University, Seoul, Republic of Korea

#### \*Corresponding author

Sun-Young Jung, PhD

College of Pharmacy, Chung-Ang University, Seoul, Republic of Korea

Department of Global Innovative Drugs, Graduate School of Chung-Ang University

Seoul, Republic of Korea

Phone: +82-2-820-5678

Email: jsyoung@cau.ac.kr

**Table S1** Comparison of baseline model selection

**Table S2** Serious AEs based on mRNA COVID-19 vaccination classified system organ class terms in VigiBase  
AE, adverse event; mRNA COVID-19, messenger RNA (mRNA) coronavirus disease 2019

**Table S3** The most frequently PTs by clusters for serious AEs after mRNA COVID-19 vaccination  
PT, preferred term; AE, adverse event; mRNA COVID-19, messenger RNA (mRNA) coronavirus disease 2019

**Table S1** Comparison of baseline model selection

| <b>Number of classes</b> | <b>maximum log-likelihood</b> | <b>AIC</b> | <b>BIC</b> | <b>G-squared (Likelihood ratio/deviance statistic)</b> | <b>X-squared (Chi-square goodness of fit)</b> |
|--------------------------|-------------------------------|------------|------------|--------------------------------------------------------|-----------------------------------------------|
| 2                        | 492                           | -1196944   | 2393927    | 2394129                                                | 61471.68                                      |
| 3                        | 482                           | -1189945   | 2379948    | 2380257                                                | 47472.62                                      |
| 4                        | 472                           | -1187351   | 2374779    | 2375195                                                | 42284.23                                      |
| 5                        | 462                           | -1172795   | 2345688    | 2346210                                                | 13172.55                                      |
| 6                        | 452                           | -1170962   | 2342042    | 2342670                                                | 9506.628                                      |
| 7                        | 442                           | -1170356   | 2340849    | 2341584                                                | 8293.831                                      |

AIC; Akaike's Information Criterion, BIC; Bayesian Information Criterion

**Table S2** Serious AEs based on mRNA COVID-19 vaccination classified system organ class terms in VigiBase.

| <b>System organ class, n (%)</b>                                    | <b>Total<br/>(n=312,878)</b> | <b>Cluster 1<br/>(n=43,606)</b> | <b>Cluster 2<br/>(n=25,301)</b> | <b>Cluster 3<br/>(n=67,881)</b> | <b>Cluster 4<br/>(n=25,529)</b> | <b>Cluster 5<br/>(n=150,561)</b> |
|---------------------------------------------------------------------|------------------------------|---------------------------------|---------------------------------|---------------------------------|---------------------------------|----------------------------------|
| Blood and lymphatic system disorders                                | 14,972(4.8)                  | 740(1.7)                        | 328(1.3)                        | 3,366(5.0)                      | 2,162(8.5)                      | 8,376(5.6)                       |
| Cardiac disorders                                                   | 52,149(16.7)                 | 0(0)                            | 25,301(100)                     | 16,757(24.7)                    | 10,091(39.5)                    | 0(0)                             |
| Congenital, familial and genetic disorders                          | 757(0.2)                     | 12(0)                           | 46(0.2)                         | 147(0.2)                        | 97(0.4)                         | 455(0.3)                         |
| Ear and labyrinth disorders                                         | 11,311(3.6)                  | 291(0.7)                        | 223(0.9)                        | 975(1.4)                        | 2016(7.9)                       | 7,806(5.2)                       |
| Endocrine disorders                                                 | 1,412(0.5)                   | 36(0.1)                         | 88(0.4)                         | 255(0.4)                        | 232(0.9)                        | 801(0.5)                         |
| Eye disorders                                                       | 14,655(4.7)                  | 310(0.7)                        | 243(1.0)                        | 1,581(2.3)                      | 2,697(10.6)                     | 9,824(6.5)                       |
| Gastrointestinal disorders                                          | 53,049(17.0)                 | 1,466(3.4)                      | 0(0)                            | 7,218(10.6)                     | 15,933(62.4)                    | 28,432(18.9)                     |
| General disorders and administration site conditions                | 159,598(51.0)                | 28,927(66.3)                    | 7,503(29.7)                     | 30,199(44.5)                    | 20,714(81.1)                    | 72,255(48)                       |
| Hepatobiliary disorders                                             | 2,826(0.9)                   | 207(0.5)                        | 74(0.3)                         | 607(0.9)                        | 406(1.6)                        | 1,532(1)                         |
| Immune system disorders                                             | 10,747(3.4)                  | 204(0.5)                        | 181(0.7)                        | 3,565(5.3)                      | 1,874(7.3)                      | 4,923(3.3)                       |
| Infections and infestations                                         | 59,334(19.0)                 | 43,606(100)                     | 0(0)                            | 8,687(12.8)                     | 6,770(26.5)                     | 271(0.2)                         |
| Injury, poisoning and procedural complications                      | 18,550(5.9)                  | 857(2.0)                        | 694(2.7)                        | 3,454(5.1)                      | 3,247(12.7)                     | 10,298(6.8)                      |
| Investigations                                                      | 94,702(30.3)                 | 11,755(27.0)                    | 8,077(31.9)                     | 25,412(37.4)                    | 12,808(50.2)                    | 36,650(24.3)                     |
| Metabolism and nutrition disorders                                  | 10,266(3.3)                  | 797(1.8)                        | 235(0.9)                        | 2,389(3.5)                      | 2,467(9.7)                      | 4,378(2.9)                       |
| Musculoskeletal and connective tissue disorders                     | 59,266(18.9)                 | 0(0)                            | 0(0)                            | 5,939(8.8)                      | 15,340(60.1)                    | 37,987(25.2)                     |
| Neoplasms benign, malignant and unspecified (incl cysts and polyps) | 1,865(0.6)                   | 131(0.3)                        | 35(0.1)                         | 378(0.6)                        | 170(0.7)                        | 1,151(0.8)                       |
| Nervous system disorders                                            | 118,530(37.9)                | 2,457(5.6)                      | 3,620(14.3)                     | 8,130(12.0)                     | 23,634(92.6)                    | 80,689(53.6)                     |
| Product issues                                                      | 2,602(0.8)                   | 69(0.2)                         | 30(0.1)                         | 150(0.2)                        | 31(0.1)                         | 2,322(1.5)                       |

|                                                  |              |             |            |              |             |            |
|--------------------------------------------------|--------------|-------------|------------|--------------|-------------|------------|
| Pregnancy, puerperium and perinatal conditions   | 110(0)       | 12(0)       | 6(0)       | 26(0.0)      | 18(0.1)     | 48.0(0.0)  |
| Psychiatric disorders                            | 17,205(5.5)  | 774(1.8)    | 562(2.2)   | 3,003(4.4)   | 3,951(15.5) | 8,915(5.9) |
| Renal and urinary disorders                      | 7,467(2.4)   | 720(1.7)    | 181(0.7)   | 1,795(2.6)   | 1,481(5.8)  | 3,290(2.2) |
| Reproductive system and breast disorders         | 9,318(3)     | 257(0.6)    | 227(0.9)   | 1,044(1.5)   | 886(3.5)    | 6,904(4.6) |
| Respiratory, thoracic, and mediastinal disorders | 59,644(19.1) | 4,651(10.7) | 0(0)       | 40,699(60.0) | 14,294(56)  | 0(0)       |
| Skin and subcutaneous tissue disorders           | 29,753(9.5)  | 0(0)        | 0(0)       | 13,961(20.6) | 8,029(31.5) | 7,763(5.2) |
| Social circumstances                             | 4,700(1.5)   | 167(0.4)    | 146(0.6)   | 688(1.0)     | 1,086(4.3)  | 2,613(1.7) |
| Surgical and medical procedures                  | 15,622(5)    | 1,644(3.8)  | 1,370(5.4) | 4,709(6.9)   | 2,381(9.3)  | 5,518(3.7) |
| Vascular disorders                               | 35,587(10.4) | 0(0)        | 0(0)       | 20,512(30.2) | 5,267(20.6) | 6,808(4.5) |

AE, adverse event; COVID-19; coronavirus disease 2019, cluster 1: infection AEs, cluster 2: cardiac AEs, cluster 3: respiratory AEs, cluster 4: systemic AEs, cluster 5: nervous system AEs

**Table S3** The most frequently PTs by clusters for serious AEs after mRNA COVID-19 vaccination.

Abbreviation: PT, preferred term; AE, adverse event

**Table S3-1** The most frequently PTs by cluster 1 (infection AEs)

|           | Gastrointestinal disorders   |     |       | Infections and infestations    |       |        | Injury, poisoning and procedural complications   |     |       |
|-----------|------------------------------|-----|-------|--------------------------------|-------|--------|--------------------------------------------------|-----|-------|
|           | PTs                          | N   | %     | PTs                            | N     | %      | PTs                                              | N   | %     |
| <b>1</b>  | Vomiting                     | 384 | (0.9) | COVID-19                       | 29406 | (67.4) | Inappropriate schedule of product administration | 236 | (0.5) |
| <b>2</b>  | Abdominal pain               | 355 | (0.8) | Herpes zoster                  | 2541  | (5.8)  | Fall                                             | 168 | (0.4) |
| <b>3</b>  | Nausea                       | 340 | (0.8) | COVID-19 pneumonia             | 2273  | (5.2)  | Off label use                                    | 130 | (0.3) |
| <b>4</b>  | Diarrhoea                    | 309 | (0.7) | Pneumonia                      | 1837  | (4.2)  | Exposure to SARS-CoV-2                           | 60  | (0.1) |
| <b>5</b>  | Abdominal pain upper         | 132 | (0.3) | Vaccine breakthrough infection | 1158  | (2.7)  | Exposure during pregnancy                        | 50  | (0.1) |
| <b>6</b>  | Abdominal pain lower         | 93  | (0.2) | Appendicitis                   | 901   | (2.1)  | Maternal exposure during pregnancy               | 33  | (0.1) |
| <b>7</b>  | Abdominal discomfort         | 42  | (0.1) | Sepsis                         | 517   | (1.2)  | Incomplete course of vaccination                 | 28  | (0.1) |
| <b>8</b>  | Constipation                 | 37  | (0.1) | Influenza                      | 513   | (1.2)  | Product use issue                                | 20  | (0.0) |
| <b>9</b>  | Colitis                      | 29  | (0.1) | Asymptomatic COVID-19          | 481   | (1.1)  | Product dose omission issue                      | 17  | (0.0) |
| <b>10</b> | Gastrointestinal haemorrhage | 27  | (0.1) | Urinary tract infection        | 448   | (1.0)  | Extra administered dose                          | 16  | (0.0) |
| <b>11</b> | Abdominal distension         | 27  | (0.1) | Nasopharyngitis                | 382   | (0.9)  | Incorrect route of product administration        | 14  | (0.0) |
| <b>12</b> | Dysphagia                    | 24  | (0.1) | Infection                      | 363   | (0.8)  | Hip fracture                                     | 9   | (0.0) |
| <b>13</b> | Intestinal obstruction       | 19  | (0.0) | Ophthalmic herpes zoster       | 348   | (0.8)  | Head injury                                      | 8   | (0.0) |
| <b>14</b> | Rectal haemorrhage           | 16  | (0.0) | Vestibular neuronitis          | 336   | (0.8)  | Vaccination complication                         | 8   | (0.0) |
| <b>15</b> | Colitis ulcerative           | 16  | (0.0) | Encephalitis                   | 297   | (0.7)  | Road traffic accident                            | 7   | (0.0) |
| <b>16</b> | Pancreatitis acute           | 15  | (0.0) | Myelitis                       | 244   | (0.6)  | Nerve injury                                     | 7   | (0.0) |
| <b>17</b> | Gastrointestinal disorder    | 14  | (0.0) | Suspected COVID-19             | 206   | (0.5)  | Contusion                                        | 7   | (0.0) |
| <b>18</b> | Intestinal ischaemia         | 13  | (0.0) | Cellulitis                     | 199   | (0.5)  | Maternal exposure during breast feeding          | 7   | (0.0) |
| <b>19</b> | Haematochezia                | 12  | (0.0) | Septic shock                   | 163   | (0.4)  | Wound                                            | 7   | (0.0) |
| <b>20</b> | Flatulence                   | 12  | (0.0) | Erysipelas                     | 163   | (0.4)  | Scar                                             | 6   | (0.0) |
| <b>21</b> | Pancreatitis                 | 12  | (0.0) | Pneumonia aspiration           | 147   | (0.3)  | Fracture                                         | 5   | (0.0) |
| <b>22</b> | Ileus                        | 12  | (0.0) | Diverticulitis                 | 129   | (0.3)  | Arthropod bite                                   | 5   | (0.0) |

|    |                              |    |       |                         |     |       |                                                      |   |       |
|----|------------------------------|----|-------|-------------------------|-----|-------|------------------------------------------------------|---|-------|
| 23 | Gastritis                    | 12 | (0.0) | Oral herpes             | 119 | (0.3) | Product administered to patient of inappropriate age | 5 | (0.0) |
| 24 | Large intestine perforation  | 11 | (0.0) | Appendicitis perforated | 118 | (0.3) | Limb injury                                          | 4 | (0.0) |
| 25 | Gastrointestinal pain        | 11 | (0.0) | Bronchitis              | 115 | (0.3) | Post procedural complication                         | 4 | (0.0) |
| 26 | Small intestinal obstruction | 10 | (0.0) | Pyelonephritis          | 106 | (0.2) | Femur fracture                                       | 4 | (0.0) |
| 27 | Stomatitis                   | 10 | (0.0) | Herpes zoster oticus    | 105 | (0.2) | Rib fracture                                         | 4 | (0.0) |
| 28 | Dyspepsia                    | 10 | (0.0) | Meningitis              | 104 | (0.2) | Femoral neck fracture                                | 4 | (0.0) |
| 29 | Haematemesis                 | 10 | (0.0) | Gastroenteritis         | 91  | (0.2) | Injury                                               | 4 | (0.0) |
| 30 | Aphthous ulcer               | 9  | (0.0) | Meningitis aseptic      | 87  | (0.2) | Contraindicated product prescribed                   | 3 | (0.0) |

| <b>Nervous system disorders</b> |                          |          |          | <b>Respiratory, thoracic and mediastinal disorders</b> |          |          |
|---------------------------------|--------------------------|----------|----------|--------------------------------------------------------|----------|----------|
|                                 | <b>PTs</b>               | <b>N</b> | <b>%</b> | <b>PTs</b>                                             | <b>N</b> | <b>%</b> |
| 1                               | Headache                 | 656      | (1.5)    | Dyspnoea                                               | 2053     | (4.7)    |
| 2                               | Dizziness                | 218      | (0.5)    | Cough                                                  | 1388     | (3.2)    |
| 3                               | Facial paralysis         | 142      | (0.3)    | Hypoxia                                                | 596      | (1.4)    |
| 4                               | Paraesthesia             | 128      | (0.3)    | Acute respiratory failure                              | 532      | (1.2)    |
| 5                               | Cerebrovascular accident | 125      | (0.3)    | Pulmonary embolism                                     | 355      | (0.8)    |
| 6                               | Neuralgia                | 105      | (0.2)    | Respiratory failure                                    | 311      | (0.7)    |
| 7                               | Hypoaesthesia            | 99       | (0.2)    | Lung opacity                                           | 206      | (0.5)    |
| 8                               | Seizure                  | 92       | (0.2)    | Oropharyngeal pain                                     | 181      | (0.4)    |
| 9                               | Syncope                  | 74       | (0.2)    | Productive cough                                       | 137      | (0.3)    |
| 10                              | Post herpetic neuralgia  | 61       | (0.1)    | Respiratory distress                                   | 129      | (0.3)    |
| 11                              | Aphasia                  | 61       | (0.1)    | Lung infiltration                                      | 128      | (0.3)    |
| 12                              | Loss of consciousness    | 54       | (0.1)    | Dyspnoea exertional                                    | 124      | (0.3)    |
| 13                              | Balance disorder         | 53       | (0.1)    | Acute respiratory distress syndrome                    | 106      | (0.2)    |
| 14                              | Tremor                   | 52       | (0.1)    | Rhinorrhoea                                            | 102      | (0.2)    |
| 15                              | Somnolence               | 51       | (0.1)    | Chronic obstructive pulmonary disease                  | 101      | (0.2)    |
| 16                              | Guillain-Barre syndrome  | 49       | (0.1)    | Pleural effusion                                       | 99       | (0.2)    |

|    |                      |    |       |                              |    |       |
|----|----------------------|----|-------|------------------------------|----|-------|
| 17 | Ageusia              | 49 | (0.1) | Respiratory tract congestion | 91 | (0.2) |
| 18 | Encephalopathy       | 48 | (0.1) | Lung disorder                | 68 | (0.2) |
| 19 | Facial paresis       | 46 | (0.1) | Tachypnoea                   | 66 | (0.2) |
| 20 | Lethargy             | 45 | (0.1) | Interstitial lung disease    | 61 | (0.1) |
| 21 | Migraine             | 41 | (0.1) | Asthma                       | 60 | (0.1) |
| 22 | Anosmia              | 37 | (0.1) | Nasal congestion             | 57 | (0.1) |
| 23 | Cerebral infarction  | 37 | (0.1) | Respiratory disorder         | 49 | (0.1) |
| 24 | Bell's palsy         | 37 | (0.1) | Wheezing                     | 47 | (0.1) |
| 25 | Hemiparesis          | 35 | (0.1) | Haemoptysis                  | 46 | (0.1) |
| 26 | Epilepsy             | 34 | (0.1) | Respiratory symptom          | 42 | (0.1) |
| 27 | Ischaemic stroke     | 33 | (0.1) | Atelectasis                  | 41 | (0.1) |
| 28 | Memory impairment    | 30 | (0.1) | Pneumonitis                  | 39 | (0.1) |
| 29 | Speech disorder      | 27 | (0.1) | Pulmonary oedema             | 29 | (0.1) |
| 30 | Unresponsive stimuli | 27 | (0.1) | Lung consolidation           | 28 | (0.1) |

---

**Table S3-2** The most frequently PTs by cluster 2 (cardiac AEs)

| Cardiac disorder                |      |        | Injury, poisoning and procedural complications       |     |       | Nervous system disorder    |     |       |
|---------------------------------|------|--------|------------------------------------------------------|-----|-------|----------------------------|-----|-------|
| PTs                             | N    | %      | PTs                                                  | N   | %     | PTs                        | N   | %     |
| 1 Myocarditis                   | 6327 | (25.0) | Inappropriate schedule of product administration     | 303 | (1.2) | Dizziness                  | 855 | (3.4) |
| 2 Pericarditis                  | 3719 | (14.7) | Off label use                                        | 142 | (0.6) | Headache                   | 784 | (3.1) |
| 3 Palpitations                  | 2068 | (8.2)  | Fall                                                 | 50  | (0.2) | Syncope                    | 444 | (1.8) |
| 4 Myocardial infarction         | 2002 | (7.9)  | Maternal exposure during pregnancy                   | 31  | (0.1) | Paraesthesia               | 321 | (1.3) |
| 5 Atrial fibrillation           | 1942 | (7.7)  | Incorrect route of product administration            | 24  | (0.1) | Loss of consciousness      | 273 | (1.1) |
| 6 Tachycardia                   | 1754 | (6.9)  | Vaccination complication                             | 23  | (0.1) | Cerebrovascular accident   | 202 | (0.8) |
| 7 Arrhythmia                    | 1727 | (6.8)  | Exposure during pregnancy                            | 20  | (0.1) | Hypoaesthesia              | 166 | (0.7) |
| 8 Acute myocardial infarction   | 1228 | (4.9)  | Product use issue                                    | 19  | (0.1) | Tremor                     | 134 | (0.5) |
| 9 Cardiac arrest                | 1199 | (4.7)  | Overdose                                             | 12  | (0.0) | Presyncope                 | 128 | (0.5) |
| 10 Myopericarditis              | 884  | (3.5)  | Product dose omission issue                          | 9   | (0.0) | Ischaemic stroke           | 115 | (0.5) |
| 11 Cardiac failure              | 758  | (3.0)  | Extra dose administered                              | 8   | (0.0) | Seizure                    | 91  | (0.4) |
| 12 Angina pectoris              | 638  | (2.5)  | Contusion                                            | 7   | (0.0) | Cerebral infarction        | 76  | (0.3) |
| 13 Pericardial effusion         | 566  | (2.2)  | Maternal exposure during breast feeding              | 5   | (0.0) | Unresponsive to stimuli    | 72  | (0.3) |
| 14 Cardio-respiratory arrest    | 516  | (2.0)  | Foetal exposure during pregnancy                     | 5   | (0.0) | Somnolence                 | 64  | (0.3) |
| 15 Acute coronary syndrome      | 332  | (1.3)  | Incorrect dose administered                          | 4   | (0.0) | Lethargy                   | 60  | (0.2) |
| 16 Extrasystoles                | 277  | (1.1)  | Road traffic accident                                | 3   | (0.0) | Migraine                   | 46  | (0.2) |
| 17 Bradycardia                  | 266  | (1.1)  | Product administered to patient of inappropriate age | 3   | (0.0) | Transient ischaemic attack | 44  | (0.2) |
| 18 Ventricular fibrillation     | 263  | (1.0)  | Accidental underdose                                 | 3   | (0.0) | Burning sensation          | 39  | (0.2) |
| 19 Cardiovascular disorder      | 232  | (0.9)  | Traumatic lung injury                                | 2   | (0.0) | Disturbance in attention   | 38  | (0.2) |
| 20 Supraventricular tachycardia | 227  | (0.9)  | Product preparation error                            | 2   | (0.0) | Hemiparesis                | 37  | (0.1) |



|    |                            |     |       |                                      |   |       |                                  |    |       |
|----|----------------------------|-----|-------|--------------------------------------|---|-------|----------------------------------|----|-------|
| 21 | Cardiac disorder           | 223 | (0.9) | Post procedural haemorrhage          | 2 | (0.0) | Balance disorder                 | 37 | (0.1) |
| 22 | Ventricular tachycardia    | 199 | (0.8) | Nerve injury                         | 2 | (0.0) | Aphasia                          | 35 | (0.1) |
| 23 | Atrial flutter             | 192 | (0.8) | Muscle strain                        | 2 | (0.0) | Coma                             | 33 | (0.1) |
| 24 | Ventricular extrasystoles  | 187 | (0.7) | Multiple injuries                    | 2 | (0.0) | Facial paralysis                 | 31 | (0.1) |
| 25 | Sinus tachycardia          | 173 | (0.7) | Maternal exposure timing unspecified | 2 | (0.0) | Cerebral haemorrhage             | 31 | (0.1) |
| 26 | Cardiac failure acute      | 157 | (0.6) | Injury corneal                       | 2 | (0.0) | Head discomfort                  | 30 | (0.1) |
| 27 | Cardiogenic shock          | 127 | (0.5) | Incomplete course of vaccination     | 2 | (0.0) | Memory impairment                | 29 | (0.1) |
| 28 | Cardiac failure congestive | 124 | (0.5) | Craniocerebral injury                | 2 | (0.0) | Brain injury                     | 29 | (0.1) |
| 29 | Cardiomyopathy             | 123 | (0.5) | Coronary artery reocclusion          | 2 | (0.0) | Dysarthria                       | 27 | (0.1) |
| 30 | Cardiac flutter            | 119 | (0.5) | Chest injury                         | 2 | (0.0) | Depressed level of consciousness | 27 | (0.1) |

---

**Table S3-3** The most frequently PTs by cluster 3 (respiratory/thrombotic AEs)

|    | Cardiac disorder            |      |       | Gastrointestinal disorders   |      |       | Infections and infestations       |      |       |
|----|-----------------------------|------|-------|------------------------------|------|-------|-----------------------------------|------|-------|
|    | PTs                         | N    | %     | PTs                          | N    | %     | PTs                               | N    | %     |
| 1  | Tachycardia                 | 3057 | (4.5) | Nausea                       | 2020 | (3.0) | COVID-19                          | 3180 | (4.7) |
| 2  | Palpitations                | 2725 | (4.0) | Vomiting                     | 1694 | (2.5) | Pneumonia                         | 1341 | (2.0) |
| 3  | Myocarditis                 | 2260 | (3.3) | Diarrhoea                    | 1335 | (2.0) | COVID-19 pneumonia                | 955  | (1.4) |
| 4  | Pericarditis                | 1508 | (2.2) | Abdominal pain               | 719  | (1.1) | Herpes zoster                     | 523  | (0.8) |
| 5  | Atrial fibrillation         | 1365 | (2.0) | Dysphagia                    | 428  | (0.6) | Sepsis                            | 454  | (0.7) |
| 6  | Arrhythmia                  | 1091 | (1.6) | Swollen tongue               | 403  | (0.6) | Influenza                         | 386  | (0.6) |
| 7  | Cardiac failure             | 1081 | (1.6) | Abdominal pain upper         | 352  | (0.5) | Urinary tract infection           | 307  | (0.5) |
| 8  | Cardiac arrest              | 866  | (1.3) | Lip swelling                 | 280  | (0.4) | Nasopharyngitis                   | 286  | (0.4) |
| 9  | Myocardial infarction       | 823  | (1.2) | Paraesthesia oral            | 245  | (0.4) | Infection                         | 205  | (0.3) |
| 10 | Pericardial effusion        | 698  | (1.0) | Abdominal discomfort         | 133  | (0.2) | Septic shock                      | 168  | (0.2) |
| 11 | Acute myocardial infarction | 586  | (0.9) | Gastrointestinal haemorrhage | 109  | (0.2) | Cellulitis                        | 165  | (0.2) |
| 12 | Angina pectoris             | 560  | (0.8) | Dyspepsia                    | 106  | (0.2) | Vaccine breakthrough infection    | 162  | (0.2) |
| 13 | Cardiac failure congestive  | 409  | (0.6) | Tongue oedema                | 95   | (0.1) | Bronchitis                        | 114  | (0.2) |
| 14 | Cardio-respiratory arrest   | 366  | (0.5) | Hypoaesthesia oral           | 90   | (0.1) | Pneumonia aspiration              | 107  | (0.2) |
| 15 | Bradycardia                 | 354  | (0.5) | Abdominal distension         | 88   | (0.1) | Erysipelas                        | 90   | (0.1) |
| 16 | Cardiomegaly                | 307  | (0.5) | Dry mouth                    | 87   | (0.1) | Suspected COVID-19                | 84   | (0.1) |
| 17 | Cardiac disorder            | 287  | (0.4) | Odynophagia                  | 83   | (0.1) | Asymptomatic COVID-19             | 78   | (0.1) |
| 18 | Cardiovascular disorder     | 234  | (0.3) | Abdominal pain lower         | 76   | (0.1) | Rhinitis                          | 76   | (0.1) |
| 19 | Sinus tachycardia           | 227  | (0.3) | Haematemesis                 | 68   | (0.1) | Viral infection                   | 76   | (0.1) |
| 20 | Extrasystoles               | 197  | (0.3) | Lip oedema                   | 67   | (0.1) | Pneumonia bacterial               | 72   | (0.1) |
| 21 | Cardiac failure acute       | 189  | (0.3) | Constipation                 | 67   | (0.1) | Sinusitis                         | 71   | (0.1) |
| 22 | Cardiogenic shock           | 164  | (0.2) | Mouth swelling               | 65   | (0.1) | Conjunctivitis                    | 68   | (0.1) |
| 23 | Ventricular extrasystoles   | 156  | (0.2) | Ascites                      | 65   | (0.1) | Oral herpes                       | 58   | (0.1) |
| 24 | Myopericarditis             | 151  | (0.2) | Haematochezia                | 61   | (0.1) | Appendicitis                      | 58   | (0.1) |
| 25 | Ventricular tachycardia     | 137  | (0.2) | Retching                     | 59   | (0.1) | Lower respiratory tract infection | 53   | (0.1) |
| 26 | Cardiomyopathy              | 136  | (0.2) | Gastrointestinal disorder    | 55   | (0.1) | Pneumonia viral                   | 50   | (0.1) |

|    |                              |          |     |       |                                  |    |       |                                   |       |    |       |
|----|------------------------------|----------|-----|-------|----------------------------------|----|-------|-----------------------------------|-------|----|-------|
| 27 | Coronary disease             | artery   | 132 | (0.2) | Mouth haemorrhage                | 54 | (0.1) | Respiratory infection             | tract | 50 | (0.1) |
| 28 | Supraventricular tachycardia |          | 123 | (0.2) | Gingival bleeding                | 53 | (0.1) | Endocarditis                      |       | 45 | (0.1) |
| 29 | Mitral incompetence          | valve    | 116 | (0.2) | Rectal haemorrhage               | 52 | (0.1) | Upper respiratory tract infection |       | 41 | (0.1) |
| 30 | Acute syndrome               | coronary | 116 | (0.2) | Gastrooesophageal reflux disease | 49 | (0.1) | Bacterial infection               |       | 41 | (0.1) |

| Injury, poisoning and procedural complications |                                                  |  |     | Nervous system disorders |                            |      | Nervous system disorder |                                  |     |      |       |
|------------------------------------------------|--------------------------------------------------|--|-----|--------------------------|----------------------------|------|-------------------------|----------------------------------|-----|------|-------|
|                                                |                                                  |  |     |                          |                            |      |                         |                                  |     |      |       |
|                                                |                                                  |  | PTs | N                        | %                          | PTs  | N                       | %                                | PTs | N    | %     |
| 1                                              | Inappropriate schedule of product administration |  | 861 | (1.3)                    | Pain in extremity          | 1634 | (2.4)                   | Headache                         |     | 2222 | (3.3) |
| 2                                              | Fall                                             |  | 555 | (0.8)                    | Myalgia                    | 1482 | (2.2)                   | Dizziness                        |     | 1750 | (2.6) |
| 3                                              | Off label use                                    |  | 550 | (0.8)                    | Arthralgia                 | 1269 | (1.9)                   | Syncope                          |     | 684  | (1.0) |
| 4                                              | Contusion                                        |  | 284 | (0.4)                    | Back pain                  | 634  | (0.9)                   | Paraesthesia                     |     | 621  | (0.9) |
| 5                                              | Exposure to SARS-CoV-2                           |  | 207 | (0.3)                    | Neck pain                  | 242  | (0.4)                   | Loss of consciousness            |     | 525  | (0.8) |
| 6                                              | Incorrect route of product administration        |  | 136 | (0.2)                    | Limb discomfort            | 231  | (0.3)                   | Hypoaesthesia                    |     | 385  | (0.6) |
| 7                                              | Vaccination complication                         |  | 103 | (0.2)                    | Muscular weakness          | 218  | (0.3)                   | Tremor                           |     | 340  | (0.5) |
| 8                                              | Exposure during pregnancy                        |  | 96  | (0.1)                    | Mobility decreased         | 184  | (0.3)                   | Somnolence                       |     | 295  | (0.4) |
| 9                                              | Maternal exposure during pregnancy               |  | 96  | (0.1)                    | Muscle spasms              | 163  | (0.2)                   | Presyncope                       |     | 284  | (0.4) |
| 10                                             | Product use issue                                |  | 75  | (0.1)                    | Musculoskeletal chest pain | 152  | (0.2)                   | Lethargy                         |     | 279  | (0.4) |
| 11                                             | Extra administered dose                          |  | 51  | (0.1)                    | Joint swelling             | 122  | (0.2)                   | Cerebrovascular accident         |     | 259  | (0.4) |
| 12                                             | Head injury                                      |  | 42  | (0.1)                    | Pain in jaw                | 102  | (0.2)                   | Unresponsive stimuli             | to  | 254  | (0.4) |
| 13                                             | Overdose                                         |  | 40  | (0.1)                    | Musculoskeletal pain       | 100  | (0.1)                   | Seizure                          |     | 239  | (0.4) |
| 14                                             | Wound                                            |  | 34  | (0.1)                    | Musculoskeletal stiffness  | 98   | (0.1)                   | Anosmia                          |     | 196  | (0.3) |
| 15                                             | Incomplete course of vaccination                 |  | 29  | (0.0)                    | Flank pain                 | 78   | (0.1)                   | Ageusia                          |     | 180  | (0.3) |
| 16                                             | Product dose omission issue                      |  | 25  | (0.0)                    | Arthritis                  | 61   | (0.1)                   | Depressed level of consciousness | of  | 146  | (0.2) |

|    |                                         |    |       |                              |    |       |                                |     |       |
|----|-----------------------------------------|----|-------|------------------------------|----|-------|--------------------------------|-----|-------|
| 17 | Muscle strain                           | 23 | (0.0) | Bone pain                    | 59 | (0.1) | Aphasia                        | 136 | (0.2) |
| 18 | Maternal exposure during breast feeding | 23 | (0.0) | Rheumatoid arthritis         | 52 | (0.1) | Migraine                       | 116 | (0.2) |
| 19 | Rib fracture                            | 23 | (0.0) | Weight bearing difficulty    | 44 | (0.1) | Speech disorder                | 115 | (0.2) |
| 20 | Scar                                    | 21 | (0.0) | Rhabdomyolysis               | 40 | (0.1) | Ischaemic stroke               | 105 | (0.2) |
| 21 | Injury                                  | 18 | (0.0) | Costochondritis              | 40 | (0.1) | Disturbance in attention       | 105 | (0.2) |
| 22 | Hip fracture                            | 18 | (0.0) | Muscle tightness             | 39 | (0.1) | Balance disorder               | 104 | (0.2) |
| 23 | Limb injury                             | 17 | (0.0) | Musculoskeletal discomfort   | 37 | (0.1) | Altered state of consciousness | 89  | (0.1) |
| 24 | Skin abrasion                           | 17 | (0.0) | Muscle twitching             | 36 | (0.1) | Facial paralysis               | 87  | (0.1) |
| 25 | Subdural haematoma                      | 17 | (0.0) | Groin pain                   | 35 | (0.1) | Cerebral infarction            | 87  | (0.1) |
| 26 | Femur fracture                          | 14 | (0.0) | Spinal pain                  | 34 | (0.1) | Hemiparesis                    | 86  | (0.1) |
| 27 | Skin laceration                         | 14 | (0.0) | Myositis                     | 34 | (0.1) | Dysarthria                     | 82  | (0.1) |
| 28 | Exposure via breast milk                | 13 | (0.0) | Polymyalgia rheumatica       | 25 | (0.0) | Head discomfort                | 73  | (0.1) |
| 29 | Traumatic lung injury                   | 13 | (0.0) | Systemic erythematosus lupus | 24 | (0.0) | Transient ischaemic attack     | 68  | (0.1) |
| 30 | Road traffic accident                   | 13 | (0.0) | Joint stiffness              | 22 | (0.0) | Coma                           | 67  | (0.1) |

| Respiratory, thoracic and mediastinal disorders |                           |       | Skin and subcutaneous tissue disorders |                   |      | Vascular disorders |                             |      |       |
|-------------------------------------------------|---------------------------|-------|----------------------------------------|-------------------|------|--------------------|-----------------------------|------|-------|
| PTs                                             | N                         | %     | PTs                                    | N                 | %    | PTs                | N                           | %    |       |
| 1                                               | Dyspnoea                  | 18397 | (27.1)                                 | Rash              | 3131 | (4.6)              | Deep vein thrombosis        | 4562 | (6.7) |
| 2                                               | Pulmonary embolism        | 10074 | (14.8)                                 | Pruritus          | 2409 | (3.5)              | Hypertension                | 3387 | (5.0) |
| 3                                               | Cough                     | 5023  | (7.4)                                  | Urticaria         | 2336 | (3.4)              | Thrombosis                  | 2481 | (3.7) |
| 4                                               | Hypoxia                   | 1227  | (1.8)                                  | Erythema          | 1635 | (2.4)              | Hypotension                 | 1651 | (2.4) |
| 5                                               | Oropharyngeal pain        | 1168  | (1.7)                                  | Hyperhidrosis     | 1010 | (1.5)              | Hypertensive crisis         | 627  | (0.9) |
| 6                                               | Dyspnoea exertional       | 1157  | (1.7)                                  | Angioedema        | 941  | (1.4)              | Venous thrombosis limb      | 544  | (0.8) |
| 7                                               | Pleural effusion          | 870   | (1.3)                                  | Petechiae         | 600  | (0.9)              | Superficial thrombosis vein | 538  | (0.8) |
| 8                                               | Respiratory failure       | 860   | (1.3)                                  | Rash pruritic     | 486  | (0.7)              | Haemorrhage                 | 536  | (0.8) |
| 9                                               | Acute respiratory failure | 848   | (1.2)                                  | Rash erythematous | 450  | (0.7)              | Circulatory collapse        | 517  | (0.8) |
| 10                                              | Throat tightness          | 825   | (1.2)                                  | Cold sweat        | 292  | (0.4)              | Haematoma                   | 482  | (0.7) |
| 11                                              | Asthma                    | 791   | (1.2)                                  | Blister           | 230  | (0.3)              | Flushing                    | 447  | (0.7) |

|    |                                       |     |       |                        |     |       |                              |     |       |
|----|---------------------------------------|-----|-------|------------------------|-----|-------|------------------------------|-----|-------|
| 12 | Epistaxis                             | 788 | (1.2) | Alopecia               | 203 | (0.3) | Thrombophlebitis             | 424 | (0.6) |
| 13 | Respiratory distress                  | 758 | (1.1) | Rash macular           | 201 | (0.3) | Pallor                       | 365 | (0.5) |
| 14 | Wheezing                              | 704 | (1.0) | Purpura                | 199 | (0.3) | Venous thrombosis            | 365 | (0.5) |
| 15 | Pharyngeal swelling                   | 657 | (1.0) | Eczema                 | 199 | (0.3) | Hot flush                    | 336 | (0.5) |
| 16 | Pulmonary oedema                      | 555 | (0.8) | Rash maculo-papular    | 198 | (0.3) | Cyanosis                     | 314 | (0.5) |
| 17 | Pulmonary thrombosis                  | 549 | (0.8) | Skin discolouration    | 190 | (0.3) | Vasculitis                   | 264 | (0.4) |
| 18 | Lung opacity                          | 532 | (0.8) | Night sweats           | 188 | (0.3) | Phlebitis                    | 217 | (0.3) |
| 19 | Rhinorrhoea                           | 508 | (0.7) | Skin disorder          | 178 | (0.3) | Embolism                     | 215 | (0.3) |
| 20 | Dysphonia                             | 482 | (0.7) | Erythema multiforme    | 167 | (0.2) | Shock                        | 201 | (0.3) |
| 21 | Throat irritation                     | 474 | (0.7) | Dermatitis allergic    | 157 | (0.2) | Peripheral coldness          | 174 | (0.3) |
| 22 | Tachypnoea                            | 427 | (0.6) | Skin reaction          | 147 | (0.2) | Blood pressure fluctuation   | 163 | (0.2) |
| 23 | Productive cough                      | 419 | (0.6) | Echymosis              | 142 | (0.2) | Peripheral artery thrombosis | 162 | (0.2) |
| 24 | Respiratory arrest                    | 379 | (0.6) | Cutaneous vasculitis   | 142 | (0.2) | Aortic dissection            | 149 | (0.2) |
| 25 | Chronic obstructive pulmonary disease | 366 | (0.5) | Rash papular           | 132 | (0.2) | Peripheral ischaemia         | 140 | (0.2) |
| 26 | Lung infiltration                     | 362 | (0.5) | Pemphigoid             | 131 | (0.2) | Infarction                   | 136 | (0.2) |
| 27 | Respiratory disorder                  | 360 | (0.5) | Psoriasis              | 127 | (0.2) | Giant cell arteritis         | 131 | (0.2) |
| 28 | Lung disorder                         | 341 | (0.5) | Skin warm              | 110 | (0.2) | Ischaemia                    | 121 | (0.2) |
| 29 | Pulmonary infarction                  | 339 | (0.5) | Skin burning sensation | 110 | (0.2) | Pelvic venous thrombosis     | 115 | (0.2) |
| 30 | Oropharyngeal discomfort              | 332 | (0.5) | Dermatitis bullous     | 103 | (0.2) | Lymphoedema                  | 106 | (0.2) |

---

**Table S3-4** The most frequently PTs by cluster 4 (systemic AEs)

|    | Cardiac disorder                          |      |        | Gastrointestinal disorders       |      |        | Infections and infestations    |      |       |
|----|-------------------------------------------|------|--------|----------------------------------|------|--------|--------------------------------|------|-------|
|    | PTs                                       | N    | %      | PTs                              | N    | %      | PTs                            | N    | %     |
| 1  | Palpitations                              | 3128 | (12.3) | Nausea                           | 8040 | (31.5) | COVID-19                       | 1669 | (6.5) |
| 2  | Tachycardia                               | 2542 | (10.0) | Vomiting                         | 3700 | (14.5) | Pneumonia                      | 635  | (2.5) |
| 3  | Arrhythmia                                | 838  | (3.3)  | Diarrhoea                        | 2768 | (10.8) | Influenza                      | 567  | (2.2) |
| 4  | Myocarditis                               | 815  | (3.2)  | Abdominal pain                   | 1391 | (5.4)  | COVID-19 pneumonia             | 484  | (1.9) |
| 5  | Atrial fibrillation                       | 602  | (2.4)  | Abdominal pain upper             | 858  | (3.4)  | Herpes zoster                  | 417  | (1.6) |
| 6  | Pericarditis                              | 441  | (1.7)  | Dysphagia                        | 842  | (3.3)  | Nasopharyngitis                | 409  | (1.6) |
| 7  | Angina pectoris                           | 424  | (1.7)  | Swollen tongue                   | 509  | (2.0)  | Urinary tract infection        | 315  | (1.2) |
| 8  | Cardiac arrest                            | 394  | (1.5)  | Paraesthesia oral                | 455  | (1.8)  | Sepsis                         | 309  | (1.2) |
| 9  | Myocardial infarction                     | 362  | (1.4)  | Hypoaesthesia oral               | 379  | (1.5)  | Infection                      | 190  | (0.7) |
| 10 | Bradycardia                               | 285  | (1.1)  | Abdominal discomfort             | 367  | (1.4)  | Sinusitis                      | 126  | (0.5) |
| 11 | Cardiovascular disorder                   | 277  | (1.1)  | Lip swelling                     | 329  | (1.3)  | Appendicitis                   | 116  | (0.5) |
| 12 | Cardiac failure                           | 222  | (0.9)  | Dry mouth                        | 317  | (1.2)  | Vestibular neuronitis          | 111  | (0.4) |
| 13 | Cardiac disorder                          | 192  | (0.8)  | Dyspepsia                        | 276  | (1.1)  | Oral herpes                    | 109  | (0.4) |
| 14 | Extrasystoles                             | 182  | (0.7)  | Abdominal distension             | 235  | (0.9)  | Encephalitis                   | 105  | (0.4) |
| 15 | Acute myocardial infarction               | 182  | (0.7)  | Constipation                     | 187  | (0.7)  | Vaccine breakthrough infection | 100  | (0.4) |
| 16 | Sinus tachycardia                         | 178  | (0.7)  | Retching                         | 178  | (0.7)  | Cellulitis                     | 100  | (0.4) |
| 17 | Cardiomegaly                              | 168  | (0.7)  | Abdominal pain lower             | 144  | (0.6)  | Myelitis                       | 95   | (0.4) |
| 18 | Pericardial effusion                      | 164  | (0.6)  | Gastrointestinal disorder        | 135  | (0.5)  | Septic shock                   | 93   | (0.4) |
| 19 | Cardio-respiratory arrest                 | 133  | (0.5)  | Gastrooesophageal reflux disease | 121  | (0.5)  | Meningitis                     | 90   | (0.4) |
| 20 | Cardiac discomfort                        | 108  | (0.4)  | Toothache                        | 107  | (0.4)  | Suspected COVID-19             | 87   | (0.3) |
| 21 | Cardiac flutter                           | 107  | (0.4)  | Odynophagia                      | 101  | (0.4)  | Rhinitis                       | 86   | (0.3) |
| 22 | Ventricular extrasystoles                 | 96   | (0.4)  | Mouth swelling                   | 90   | (0.4)  | Dysentery                      | 82   | (0.3) |
| 23 | Mitral valve incompetence                 | 94   | (0.4)  | Gastrointestinal pain            | 82   | (0.3)  | Pneumonia aspiration           | 80   | (0.3) |
| 24 | Cardiac failure congestive                | 86   | (0.3)  | Flatulence                       | 76   | (0.3)  | Viral infection                | 74   | (0.3) |
| 25 | Postural orthostatic tachycardia syndrome | 76   | (0.3)  | Oral discomfort                  | 75   | (0.3)  | Conjunctivitis                 | 69   | (0.3) |
| 26 | Ventricular tachycardia                   | 71   | (0.3)  | Anal incontinence                | 74   | (0.3)  | Bronchitis                     | 65   | (0.3) |

|    |                               |  |          |                    |          |                     |          |
|----|-------------------------------|--|----------|--------------------|----------|---------------------|----------|
| 27 | Supraventricular tachycardia  |  | 66 (0.3) | Faeces discoloured | 69 (0.3) | Cystitis            | 61 (0.2) |
| 28 | Coronary artery disease       |  | 63 (0.2) | Stomatitis         | 68 (0.3) | Pneumonia bacterial | 48 (0.2) |
| 29 | Pulseless electrical activity |  | 61 (0.2) | Tongue oedema      | 67 (0.3) | Sweating fever      | 48 (0.2) |
| 30 | Tricuspid valve incompetence  |  | 59 (0.2) | Haematochezia      | 65 (0.3) | Erysipelas          | 48 (0.2) |

| <b>Injury, poisoning and procedural complications</b> |                                                  |            |          | <b>Musculoskeletal and connective tissue disorders</b> |                            |          | <b>Nervous system disorder</b> |                          |          |          |
|-------------------------------------------------------|--------------------------------------------------|------------|----------|--------------------------------------------------------|----------------------------|----------|--------------------------------|--------------------------|----------|----------|
|                                                       |                                                  | <b>PTs</b> | <b>N</b> | <b>%</b>                                               | <b>PTs</b>                 | <b>N</b> | <b>%</b>                       | <b>PTs</b>               | <b>N</b> | <b>%</b> |
| 1                                                     | Fall                                             |            | 826      | (3.2)                                                  | Myalgia                    | 5504     | (21.6)                         | Headache                 | 11188    | (43.8)   |
| 2                                                     | Inappropriate schedule of product administration |            | 552      | (2.2)                                                  | Arthralgia                 | 4204     | (16.5)                         | Dizziness                | 6563     | (25.7)   |
| 3                                                     | Off label use                                    |            | 443      | (1.7)                                                  | Pain in extremity          | 3778     | (14.8)                         | Paraesthesia             | 2710     | (10.6)   |
| 4                                                     | Contusion                                        |            | 308      | (1.2)                                                  | Back pain                  | 1469     | (5.8)                          | Hypoaesthesia            | 2161     | (8.5)    |
| 5                                                     | Exposure to SARS-CoV-2                           |            | 152      | (0.6)                                                  | Muscular weakness          | 1355     | (5.3)                          | Syncope                  | 1609     | (6.3)    |
| 6                                                     | Head injury                                      |            | 144      | (0.6)                                                  | Neck pain                  | 1017     | (4.0)                          | Tremor                   | 1564     | (6.1)    |
| 7                                                     | Vaccination complication                         |            | 126      | (0.5)                                                  | Muscle spasms              | 906      | (3.5)                          | Loss of consciousness    | 1152     | (4.5)    |
| 8                                                     | Incorrect route of product administration        |            | 78       | (0.3)                                                  | Limb discomfort            | 753      | (2.9)                          | Somnolence               | 806      | (3.2)    |
| 9                                                     | Product use issue                                |            | 69       | (0.3)                                                  | Musculoskeletal stiffness  | 592      | (2.3)                          | Migraine                 | 804      | (3.1)    |
| 10                                                    | Skin laceration                                  |            | 49       | (0.2)                                                  | Mobility decreased         | 539      | (2.1)                          | Lethargy                 | 658      | (2.6)    |
| 11                                                    | Maternal exposure during pregnancy               |            | 47       | (0.2)                                                  | Muscle twitching           | 296      | (1.2)                          | Presyncope               | 653      | (2.6)    |
| 12                                                    | Limb injury                                      |            | 34       | (0.1)                                                  | Pain in jaw                | 258      | (1.0)                          | Burning sensation        | 565      | (2.2)    |
| 13                                                    | Wound                                            |            | 32       | (0.1)                                                  | Bone pain                  | 247      | (1.0)                          | Seizure                  | 532      | (2.1)    |
| 14                                                    | Subdural haematoma                               |            | 31       | (0.1)                                                  | Joint swelling             | 242      | (0.9)                          | Balance disorder         | 482      | (1.9)    |
| 15                                                    | Incomplete course of vaccination                 |            | 31       | (0.1)                                                  | Musculoskeletal pain       | 229      | (0.9)                          | Disturbance in attention | 462      | (1.8)    |
| 16                                                    | Extra dose administered                          |            | 31       | (0.1)                                                  | Musculoskeletal chest pain | 208      | (0.8)                          | Ageusia                  | 443      | (1.7)    |
| 17                                                    | Nerve injury                                     |            | 29       | (0.1)                                                  | Muscle tightness           | 154      | (0.6)                          | Speech disorder          | 399      | (1.6)    |
| 18                                                    | Concussion                                       |            | 29       | (0.1)                                                  | Arthritis                  | 125      | (0.5)                          | Neuralgia                | 394      | (1.5)    |

|    |                                            |    |       |                                  |     |       |                                  |     |       |
|----|--------------------------------------------|----|-------|----------------------------------|-----|-------|----------------------------------|-----|-------|
| 19 | Rib fracture                               | 28 | (0.1) | Flank pain                       | 122 | (0.5) | Anosmia                          | 358 | (1.4) |
| 20 | Overdose                                   | 27 | (0.1) | Spinal pain                      | 109 | (0.4) | Head discomfort                  | 346 | (1.4) |
| 21 | Road traffic accident                      | 25 | (0.1) | Musculoskeletal discomfort       | 106 | (0.4) | Memory impairment                | 344 | (1.3) |
| 22 | Maternal exposure during breast feeding    | 23 | (0.1) | Joint stiffness                  | 97  | (0.4) | Unresponsive to stimuli          | 330 | (1.3) |
| 23 | Injury                                     | 23 | (0.1) | Muscle fatigue                   | 87  | (0.3) | Cerebrovascular accident         | 321 | (1.3) |
| 24 | Brain herniation                           | 23 | (0.1) | Groin pain                       | 69  | (0.3) | Aphasia                          | 316 | (1.2) |
| 25 | Muscle strain                              | 21 | (0.1) | Rhabdomyolysis                   | 61  | (0.2) | Dysgeusia                        | 314 | (1.2) |
| 26 | Joint injury                               | 20 | (0.1) | Muscle rigidity                  | 60  | (0.2) | Depressed level of consciousness | 309 | (1.2) |
| 27 | Exposure during pregnancy                  | 19 | (0.1) | Spinal osteoarthritis            | 57  | (0.2) | Dysarthria                       | 299 | (1.2) |
| 28 | Facial bones fracture                      | 18 | (0.1) | Joint range of motion decreased  | 57  | (0.2) | Facial paralysis                 | 290 | (1.1) |
| 29 | Skin abrasion                              | 16 | (0.1) | Intervertebral disc degeneration | 51  | (0.2) | Dysstasia                        | 290 | (1.1) |
| 30 | Product administered at inappropriate site | 16 | (0.1) | Weight bearing difficulty        | 50  | (0.2) | Amnesia                          | 215 | (0.8) |

| Respiratory, thoracic and mediastinal disorders |                      |      | Skin and subcutaneous tissue disorders |                        |      | Vascular disorders |                            |      |       |
|-------------------------------------------------|----------------------|------|----------------------------------------|------------------------|------|--------------------|----------------------------|------|-------|
|                                                 | PTs                  | N    | %                                      | PTs                    | N    | %                  | PTs                        | N    | %     |
| 1                                               | Dyspnoea             | 7670 | (30.0)                                 | Hyperhidrosis          | 2090 | (8.2)              | Hypertension               | 1258 | (4.9) |
| 2                                               | Cough                | 2676 | (10.5)                                 | Rash                   | 1645 | (6.4)              | Hypotension                | 874  | (3.4) |
| 3                                               | Oropharyngeal pain   | 1403 | (5.5)                                  | Pruritus               | 1249 | (4.9)              | Pallor                     | 432  | (1.7) |
| 4                                               | Pulmonary embolism   | 584  | (2.3)                                  | Erythema               | 969  | (3.8)              | Hot flush                  | 431  | (1.7) |
| 5                                               | Throat tightness     | 582  | (2.3)                                  | Urticaria              | 722  | (2.8)              | Peripheral coldness        | 320  | (1.3) |
| 6                                               | Pharyngeal swelling  | 498  | (2.0)                                  | Cold sweat             | 524  | (2.1)              | Thrombosis                 | 297  | (1.2) |
| 7                                               | Rhinorrhoea          | 495  | (1.9)                                  | Night sweats           | 292  | (1.1)              | Flushing                   | 290  | (1.1) |
| 8                                               | Hypoxia              | 420  | (1.6)                                  | Skin disorder          | 290  | (1.1)              | Deep vein thrombosis       | 201  | (0.8) |
| 9                                               | Dyspnoea exertional  | 402  | (1.6)                                  | Rash erythematous      | 207  | (0.8)              | Cyanosis                   | 177  | (0.7) |
| 10                                              | Dysphonia            | 385  | (1.5)                                  | Skin discolouration    | 192  | (0.8)              | Circulatory collapse       | 174  | (0.7) |
| 11                                              | Wheezing             | 378  | (1.5)                                  | Skin burning sensation | 184  | (0.7)              | Blood pressure fluctuation | 149  | (0.6) |
| 12                                              | Respiratory distress | 360  | (1.4)                                  | Angioedema             | 178  | (0.7)              | Haematoma                  | 145  | (0.6) |
| 13                                              | Lung opacity         | 334  | (1.3)                                  | Pain of skin           | 174  | (0.7)              | Haemorrhage                | 122  | (0.5) |



|    |                           |     |       |                           |     |       |                              |     |       |
|----|---------------------------|-----|-------|---------------------------|-----|-------|------------------------------|-----|-------|
| 14 | Acute respiratory failure | 328 | (1.3) | Sensitive skin            | 171 | (0.7) | Hypertensive crisis          | 101 | (0.4) |
| 15 | Throat irritation         | 298 | (1.2) | Rash pruritic             | 162 | (0.6) | Shock                        | 85  | (0.3) |
| 16 | Productive cough          | 290 | (1.1) | Rash macular              | 153 | (0.6) | Arteriosclerosis             | 67  | (0.3) |
| 17 | Nasal congestion          | 287 | (1.1) | Petechiae                 | 148 | (0.6) | Peripheral vascular disorder | 51  | (0.2) |
| 18 | Epistaxis                 | 283 | (1.1) | Skin warm                 | 130 | (0.5) | Orthostatic hypotension      | 50  | (0.2) |
| 19 | Pleural effusion          | 247 | (1.0) | Alopecia                  | 117 | (0.5) | Aortic arteriosclerosis      | 48  | (0.2) |
| 20 | Respiratory disorder      | 227 | (0.9) | Blister                   | 116 | (0.5) | Vasculitis                   | 46  | (0.2) |
| 21 | Asthma                    | 216 | (0.8) | Photosensitivity reaction | 57  | (0.2) | Ischaemia                    | 32  | (0.1) |
| 22 | Respiratory failure       | 214 | (0.8) | Skin exfoliation          | 48  | (0.2) | Peripheral venous disease    | 30  | (0.1) |
| 23 | Tachypnoea                | 210 | (0.8) | Rash papular              | 48  | (0.2) | Lymphoedema                  | 30  | (0.1) |
| 24 | Hyperventilation          | 186 | (0.7) | Livedo reticularis        | 47  | (0.2) | Vascular pain                | 29  | (0.1) |
| 25 | Oropharyngeal discomfort  | 186 | (0.7) | Acne                      | 45  | (0.2) | Poor peripheral circulation  | 29  | (0.1) |
| 26 | Lung infiltration         | 180 | (0.7) | Dry skin                  | 44  | (0.2) | Essential hypertension       | 29  | (0.1) |
| 27 | Atelectasis               | 169 | (0.7) | Skin reaction             | 43  | (0.2) | Vasodilatation               | 28  | (0.1) |
| 28 | Painful respiration       | 154 | (0.6) | Eczema                    | 43  | (0.2) | Superficial vein thrombosis  | 27  | (0.1) |
| 29 | Pulmonary oedema          | 153 | (0.6) | Skin lesion               | 42  | (0.2) | Varicose vein                | 24  | (0.1) |
| 30 | Lung disorder             | 139 | (0.5) | Dermatitis allergic       | 41  | (0.2) | Giant cell arteritis         | 24  | (0.1) |

---

**Table S3-5** The most frequently PTs by cluster 5 (nervous system AEs)

|    | Gastrointestinal disorders |       |       | Infections and infestations    |    |       | Injury, poisoning and procedural complications   |      |       |
|----|----------------------------|-------|-------|--------------------------------|----|-------|--------------------------------------------------|------|-------|
|    | PTs                        | N     | %     | PTs                            | N  | %     | PTs                                              | N    | %     |
| 1  | Nausea                     | 13018 | (8.6) | COVID-19                       | 84 | (0.1) | Fall                                             | 1960 | (1.3) |
| 2  | Vomiting                   | 6954  | (4.6) | Herpes zoster                  | 23 | (0.0) | Inappropriate schedule of product administration | 1952 | (1.3) |
| 3  | Diarrhoea                  | 4323  | (2.9) | Urinary tract infection        | 20 | (0.0) | Off label use                                    | 1435 | (1.0) |
| 4  | Abdominal pain             | 2510  | (1.7) | Influenza                      | 17 | (0.0) | Maternal exposure during pregnancy               | 711  | (0.5) |
| 5  | Abdominal pain upper       | 1685  | (1.1) | Pneumonia                      | 13 | (0.0) | Contusion                                        | 634  | (0.4) |
| 6  | Dysphagia                  | 677   | (0.4) | Nasopharyngitis                | 12 | (0.0) | Exposure during pregnancy                        | 608  | (0.4) |
| 7  | Paraesthesia oral          | 613   | (0.4) | Encephalitis                   | 12 | (0.0) | Incorrect route of product administration        | 331  | (0.2) |
| 8  | Hypoaesthesia oral         | 518   | (0.3) | Vestibular neuronitis          | 8  | (0.0) | Head injury                                      | 312  | (0.2) |
| 9  | Swollen tongue             | 457   | (0.3) | Infection                      | 8  | (0.0) | Product use issue                                | 228  | (0.2) |
| 10 | Lip swelling               | 448   | (0.3) | Sepsis                         | 7  | (0.0) | Vaccination complication                         | 203  | (0.1) |
| 11 | Pancreatitis acute         | 447   | (0.3) | Vaccine breakthrough infection | 7  | (0.0) | Subdural haematoma                               | 197  | (0.1) |
| 12 | Abdominal discomfort       | 443   | (0.3) | Pneumonia aspiration           | 5  | (0.0) | Maternal exposure during breast feeding          | 173  | (0.1) |
| 13 | Abdominal pain lower       | 289   | (0.2) | Myelitis                       | 5  | (0.0) | Nerve injury                                     | 169  | (0.1) |
| 14 | Abdominal distension       | 278   | (0.2) | Asymptomatic COVID-19          | 5  | (0.0) | Limb injury                                      | 134  | (0.1) |
| 15 | Dyspepsia                  | 251   | (0.2) | Sinusitis                      | 4  | (0.0) | Product administered at inappropriate site       | 116  | (0.1) |
| 16 | Constipation               | 248   | (0.2) | Meningitis aseptic             | 4  | (0.0) | Overdose                                         | 99   | (0.1) |
| 17 | Pancreatitis               | 235   | (0.2) | Herpes simplex                 | 4  | (0.0) | Extra administered dose                          | 96   | (0.1) |
| 18 | Dry mouth                  | 235   | (0.2) | Ophthalmic herpes zoster       | 3  | (0.0) | Injury                                           | 92   | (0.1) |
| 19 | Colitis ulcerative         | 223   | (0.1) | Meningitis bacterial           | 3  | (0.0) | Road traffic accident                            | 90   | (0.1) |
| 20 | Haematochezia              | 202   | (0.1) | Meningitis                     | 3  | (0.0) | Concussion                                       | 82   | (0.1) |
| 21 | Gastrointestinal disorder  | 184   | (0.1) | Labyrinthitis                  | 3  | (0.0) | Exposure via breast milk                         | 65   | (0.0) |
| 22 | Colitis                    | 184   | (0.1) | Kidney infection               | 3  | (0.0) | Product dose omission issue                      | 63   | (0.0) |

|    |                              |     |       |                             |   |       |                                    |    |       |
|----|------------------------------|-----|-------|-----------------------------|---|-------|------------------------------------|----|-------|
| 23 | Rectal haemorrhage           | 180 | (0.1) | Cystitis                    | 3 | (0.0) | Muscle strain                      | 60 | (0.0) |
| 24 | Gastrointestinal haemorrhage | 178 | (0.1) | COVID-19 pneumonia          | 3 | (0.0) | Incomplete course of vaccination   | 57 | (0.0) |
| 25 | Lip oedema                   | 173 | (0.1) | Appendicitis                | 3 | (0.0) | Skin laceration                    | 52 | (0.0) |
| 26 | Retching                     | 172 | (0.1) | Tooth infection             | 2 | (0.0) | Maternal exposure before pregnancy | 52 | (0.0) |
| 27 | Haematemesis                 | 153 | (0.1) | Subcutaneous abscess        | 2 | (0.0) | Face injury                        | 49 | (0.0) |
| 28 | Mesenteric vein thrombosis   | 152 | (0.1) | Pyelonephritis              | 2 | (0.0) | Wound                              | 47 | (0.0) |
| 29 | Gastrointestinal pain        | 150 | (0.1) | Post viral fatigue syndrome | 2 | (0.0) | Joint injury                       | 46 | (0.0) |
| 30 | Crohn's disease              | 120 | (0.1) | Mastitis                    | 2 | (0.0) | Joint dislocation                  | 45 | (0.0) |

| Musculoskeletal and connective tissue disorders |                           |       | Nervous system disorders |                            |       | Skin and subcutaneous tissue disorders |                        |      |       |
|-------------------------------------------------|---------------------------|-------|--------------------------|----------------------------|-------|----------------------------------------|------------------------|------|-------|
|                                                 | PTs                       | N     | %                        | PTs                        | N     | %                                      | PTs                    | N    | %     |
| 1                                               | Myalgia                   | 13373 | (8.9)                    | Headache                   | 25427 | (16.9)                                 | Rash                   | 1649 | (1.1) |
| 2                                               | Arthralgia                | 11086 | (7.4)                    | Dizziness                  | 11050 | (7.3)                                  | Hyperhidrosis          | 1331 | (0.9) |
| 3                                               | Pain in extremity         | 9465  | (6.3)                    | Paraesthesia               | 7079  | (4.7)                                  | Pruritus               | 1232 | (0.8) |
| 4                                               | Muscular weakness         | 3072  | (2.0)                    | Hypoaesthesia              | 5470  | (3.6)                                  | Erythema               | 920  | (0.6) |
| 5                                               | Back pain                 | 2488  | (1.7)                    | Cerebrovascular accident   | 5176  | (3.4)                                  | Urticaria              | 785  | (0.5) |
| 6                                               | Neck pain                 | 1633  | (1.1)                    | Syncope                    | 4518  | (3.0)                                  | Cold sweat             | 359  | (0.2) |
| 7                                               | Muscle spasms             | 1584  | (1.1)                    | Facial paralysis           | 3301  | (2.2)                                  | Rash erythematous      | 278  | (0.2) |
| 8                                               | Musculoskeletal stiffness | 1358  | (0.9)                    | Loss of consciousness      | 3068  | (2.0)                                  | Night sweats           | 256  | (0.2) |
| 9                                               | Limb discomfort           | 1294  | (0.9)                    | Seizure                    | 2444  | (1.6)                                  | Skin disorder          | 221  | (0.1) |
| 10                                              | Mobility decreased        | 1237  | (0.8)                    | Migraine                   | 2125  | (1.4)                                  | Angioedema             | 221  | (0.1) |
| 11                                              | Joint swelling            | 751   | (0.5)                    | Ischaemic stroke           | 2093  | (1.4)                                  | Petechiae              | 213  | (0.1) |
| 12                                              | Arthritis                 | 584   | (0.4)                    | Tremor                     | 2066  | (1.4)                                  | Rash pruritic          | 213  | (0.1) |
| 13                                              | Muscle twitching          | 493   | (0.3)                    | Cerebral infarction        | 1894  | (1.3)                                  | Pain of skin           | 154  | (0.1) |
| 14                                              | Rheumatoid arthritis      | 479   | (0.3)                    | Transient ischaemic attack | 1558  | (1.0)                                  | Skin burning sensation | 149  | (0.1) |
| 15                                              | Musculoskeletal pain      | 459   | (0.3)                    | Guillain-Barre syndrome    | 1494  | (1.0)                                  | Rash macular           | 137  | (0.1) |
| 16                                              | Polymyalgia rheumatica    | 458   | (0.3)                    | Hemiparesis                | 1447  | (1.0)                                  | Skin discolouration    | 128  | (0.1) |
| 17                                              | Bone pain                 | 424   | (0.3)                    | Balance disorder           | 1429  | (0.9)                                  | Blister                | 123  | (0.1) |

|    |                                 |     |       |                       |      |       |                           |      |       |
|----|---------------------------------|-----|-------|-----------------------|------|-------|---------------------------|------|-------|
| 18 | Joint range of motion decreased | 341 | (0.2) | Bell's palsy          | 1371 | (0.9) | Alopecia                  | 111  | (0.1) |
| 19 | Rhabdomyolysis                  | 289 | (0.2) | Cerebral haemorrhage  | 1352 | (0.9) | Skin warm                 | 107  | (0.1) |
| 20 | Periarthritis                   | 273 | (0.2) | Somnolence            | 1347 | (0.9) | Sensitive skin            | 107  | (0.1) |
| 21 | Joint stiffness                 | 252 | (0.2) | Aphasia               | 1245 | (0.8) | Dermatitis allergic       | 73   | (0.0) |
| 22 | Pain in jaw                     | 250 | (0.2) | Dysarthria            | 1230 | (0.8) | Photosensitivity reaction | 66   | (0.0) |
| 23 | Muscle tightness                | 221 | (0.1) | Presyncope            | 1212 | (0.8) | Purpura                   | 65   | (0.0) |
| 24 | Spinal pain                     | 202 | (0.1) | Epilepsy              | 1187 | (0.8) | Rash                      | 1649 | (1.1) |
| 25 | Bursitis                        | 194 | (0.1) | Facial paresis        | 1111 | (0.7) | Hyperhidrosis             | 1331 | (0.9) |
| 26 | Polyarthritis                   | 169 | (0.1) | Neuralgia             | 947  | (0.6) | Pruritus                  | 1232 | (0.8) |
| 27 | Musculoskeletal chest pain      | 166 | (0.1) | Speech disorder       | 924  | (0.6) | Erythema                  | 920  | (0.6) |
| 28 | Musculoskeletal disorder        | 166 | (0.1) | Disturbance attention | 924  | (0.6) | Urticaria                 | 785  | (0.5) |
| 29 | Musculoskeletal discomfort      | 162 | (0.1) | Lethargy              | 889  | (0.6) | Cold sweat                | 359  | (0.2) |
| 30 | Fibromyalgia                    | 155 | (0.1) | Burning sensation     | 884  | (0.6) | Rash erythematous         | 278  | (0.2) |

---

### Vascular disorders

---

|    | PTs                        | N    | %     |
|----|----------------------------|------|-------|
| 1  | Hypertension               | 1702 | (1.1) |
| 2  | Thrombosis                 | 757  | (0.5) |
| 3  | Hypotension                | 702  | (0.5) |
| 4  | Deep vein thrombosis       | 489  | (0.3) |
| 5  | Hot flush                  | 314  | (0.2) |
| 6  | Pallor                     | 293  | (0.2) |
| 7  | Circulatory collapse       | 263  | (0.2) |
| 8  | Hypertensive crisis        | 262  | (0.2) |
| 9  | Peripheral coldness        | 217  | (0.1) |
| 10 | Haematoma                  | 186  | (0.1) |
| 11 | Flushing                   | 165  | (0.1) |
| 12 | Haemorrhage                | 159  | (0.1) |
| 13 | Cyanosis                   | 116  | (0.1) |
| 14 | Blood pressure fluctuation | 91   | (0.1) |

|           |                                 |    |       |
|-----------|---------------------------------|----|-------|
| <b>15</b> | Ischaemia                       | 84 | (0.1) |
| <b>16</b> | Giant cell arteritis            | 72 | (0.0) |
| <b>17</b> | Venous thrombosis<br>limb       | 70 | (0.0) |
| <b>18</b> | Venous thrombosis               | 69 | (0.0) |
| <b>19</b> | Vasculitis                      | 69 | (0.0) |
| <b>20</b> | Superficial vein<br>thrombosis  | 60 | (0.0) |
| <b>21</b> | Embolism                        | 60 | (0.0) |
| <b>22</b> | Orthostatic<br>hypotension      | 56 | (0.0) |
| <b>23</b> | Arteriosclerosis                | 52 | (0.0) |
| <b>24</b> | Phlebitis                       | 49 | (0.0) |
| <b>25</b> | Thrombophlebitis                | 45 | (0.0) |
| <b>26</b> | Jugular vein<br>thrombosis      | 44 | (0.0) |
| <b>27</b> | Peripheral artery<br>thrombosis | 40 | (0.0) |
| <b>28</b> | Infarction                      | 39 | (0.0) |
| <b>29</b> | Vascular pain                   | 36 | (0.0) |
| <b>30</b> | Aneurysm                        | 36 | (0.0) |

---
